# Supplementary material
Source: Springer Nature journal article supplement (https://www.springermedizin.de/resource/supplementary/12885_2013_4082_MOESM2_ESM.pdf/9465264)
Supplement: MOESM2 [file 9465264]

**Clinician  
consent**

**Pre-visit**

**Visit**

**Post-visit**

**~3 months**

**12-18  
months**

Baseline  
Clinician  
Survey

Pre-  
Encounter  
Patient  
Survey

Record  
Clinical  
Consultation

Post-  
Encounter  
Patient  
Survey

Post-  
Encounter  
Clinician  
Survey

Follow-up  
Patient  
Survey

Follow-up  
Chart  
Review

Follow-up  
Clinician  
Survey

Optional  
Clinician  
Interview
